# Supplementary material for: Exploring a lead-free organic–inorganic semiconducting hybrid with above-room-temperature dielectric phase transition
Source: Royal Society of Chemistry journal article supplement (doi:10.1039/c9ra09289g), 2020-01-01
Supplement: c9ra09289g1.pdf [file c9ra09289g1.pdf]

Supporting Information for

## **Exploring a Lead-free Organic-Inorganic Semiconducting Hybrid with Above-Room-Temperature Dielectric Phase Transition**

Yuyin Wang,<sup>ab</sup> Shiguo Han,<sup>ab</sup> Xitao Liu,<sup>ac\*</sup> Zhenyue Wu,<sup>ab</sup> Zhihua Sun,<sup>a\*</sup> Dhananjay Dey,<sup>a</sup> Yaobin Li,<sup>a</sup> and Junhua Luo<sup>a\*</sup>

<sup>a</sup>*State Key Laboratory of Structural Chemistry, Fujian Institute of Research on the Structure of Matter, Chinese Academy of Sciences, Fuzhou, Fujian 350002, P.R.China*

<sup>b</sup>*University of Chinese Academy of Sciences, Chinese Academy of Sciences, Beijing 100039, P.R. China*

<sup>c</sup>*State Key Laboratory of Crystal Materials, Shandong University, Jinan, 250100, China*

*\*To whom correspondence should be addressed. E-mail:  
jhluo@fjirsm.ac.cn ; sunzhihua@fjirsm.ac.cn; xtliu@fjirsm.ac.cn*

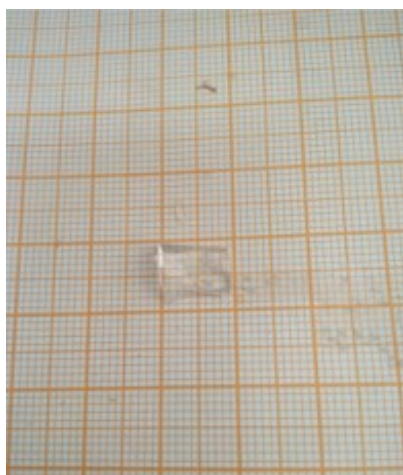

Figure. S1 Bulk crystal of CHA.

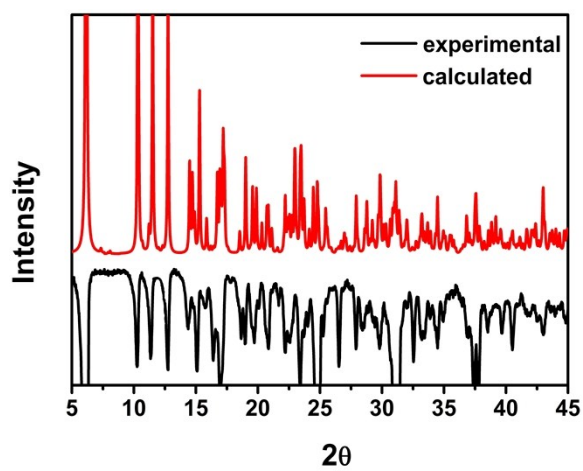

Figure S2. Powder X-ray Diffraction (PXRD) patterns of experimental data and the calculated data

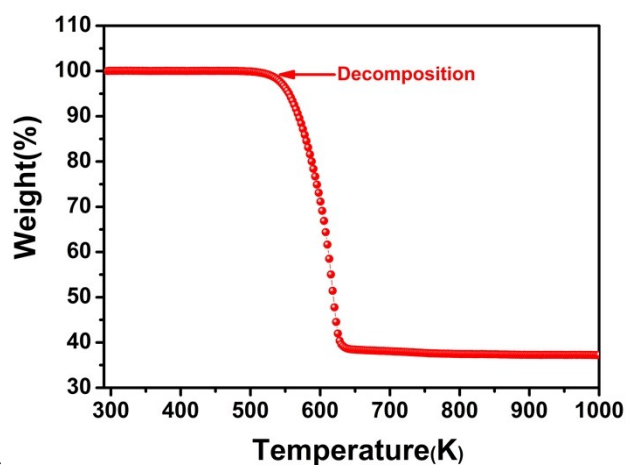

Figure S3. TG curves for CHA.

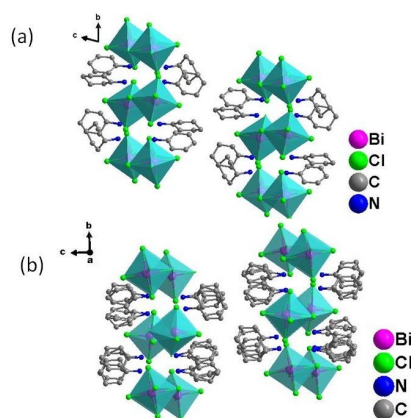

**Figure S4.** (a) Packing view of the unit cell at 200 K; (b) Packing view of the unit cell at 333K.

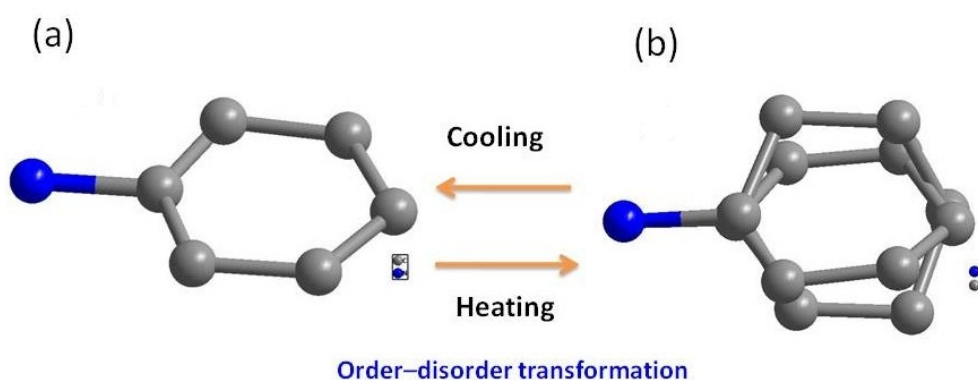

**Figure S5.** Order-disorder transformation of the cation in **CHA** during phase transition. cation attains (a) order state in RTP, and (b) disordered in HTP.

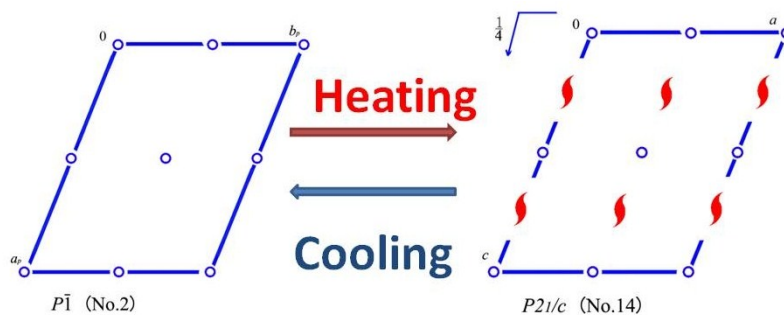

**Figure S6.** Symmetry transformation of CHA during the phase transition.

**Table S1:** Crystal structure and refinement detail of **CHA** at different temperatures.

|                   |                              |                              |
|-------------------|------------------------------|------------------------------|
| Empirical formula | $C_{24}H_{56}N_4Cl_{10}Bi_2$ | $C_{24}H_{56}Bi_2Cl_{10}N_4$ |
| Formula weight    | 1173.19                      | 1173.18                      |
| Temperature/K     | 200.15                       | 333                          |
| Crystal system    | triclinic                    | monoclinic                   |

|                                           |                                                                        |                                                                        |
|-------------------------------------------|------------------------------------------------------------------------|------------------------------------------------------------------------|
| Space group                               | P-1                                                                    | P2 <sub>1</sub> /c                                                     |
| a/Å                                       | 11.9718(4)                                                             | 11.9592(3)                                                             |
| b/Å                                       | 12.4092(4)                                                             | 12.7479(2)                                                             |
| c/Å                                       | 15.8390(6)                                                             | 31.1058(6)                                                             |
| $\alpha$ /°                               | 76.4740(10)                                                            | 90                                                                     |
| $\beta$ /°                                | 69.2450(10)                                                            | 108.8270(10)                                                           |
| $\gamma$ /°                               | 89.3230(10)                                                            | 90                                                                     |
| Volume/Å <sup>3</sup>                     | 2132.77(13)                                                            | 4488.50(16)                                                            |
| Z                                         | 2                                                                      | 4                                                                      |
| $\rho_{\text{calc}}$ /cm <sup>3</sup>     | 1.827                                                                  | 1.736                                                                  |
| $\mu$ /mm <sup>-1</sup>                   | 8.887                                                                  | 8.446                                                                  |
| F(000)                                    | 1128.0                                                                 | 2256.0                                                                 |
| Radiation                                 | MoK $\alpha$ ( $\lambda$ = 0.71073)                                    | MoK $\alpha$ ( $\lambda$ = 0.71073)                                    |
| 2 $\Theta$ range for data collection/°    | 4.78 to 55.14                                                          | 4.812 to 55.008                                                        |
| Index ranges                              | -15 $\leq$ h $\leq$ 15, -16 $\leq$ k $\leq$ 16, -20 $\leq$ l $\leq$ 20 | -15 $\leq$ h $\leq$ 15, -16 $\leq$ k $\leq$ 16, -40 $\leq$ l $\leq$ 40 |
| Reflections collected                     | 43425                                                                  | 92899                                                                  |
| Independent reflections                   | 9781 [R <sub>int</sub> = 0.0643, R <sub>sigma</sub> = 0.0507]          | 10303 [R <sub>int</sub> = 0.0816, R <sub>sigma</sub> = 0.0427]         |
| Data/restraints/parameters                | 9781/175/365                                                           | 10303/347/541                                                          |
| Goodness-of-fit on F <sup>2</sup>         | 1.047                                                                  | 1.038                                                                  |
| Final R indexes [I $\geq$ 2 $\sigma$ (I)] | R <sub>1</sub> = 0.0520, wR <sub>2</sub> = 0.1444                      | R <sub>1</sub> = 0.0400, wR <sub>2</sub> = 0.0849                      |
| Final R indexes [all data]                | R <sub>1</sub> = 0.0671, wR <sub>2</sub> = 0.1556                      | R <sub>1</sub> = 0.0781, wR <sub>2</sub> = 0.1006                      |
| Largest diff. peak/hole /                 | 5.63/-2.54                                                             | 1.22/-1.21                                                             |

e Å<sup>-3</sup>

---
